# Supplementary material for: Universal Newborn Hearing Screening Program: 10-Year Outcome and Follow-Up from a Screening Center in Germany
Source: MDPI journal article supplement (doi:10.3390/ijns9040061), 2023-10-23
Supplement: s1 [file s1]

## Supplementary material

**Table S1.** Newborn hearing screening in North-Rhine, screened and recruited in the North-Rhine Hearing Screening Centre for the years 2007 – 2016. LTF: lost to follow-up, FU: follow-up, CR: coverage rate.

| <i>Year</i>  | <b>Live births in region</b> | <b>Birthing/ DSFC centers participating</b> | <b>Newborns eligible for screening* (%)</b> | <b>Newborns participated (CR in %)</b> | <b>Parental refusal (%)</b> | <b>FU2/Referral rate (%)</b> | <b>LTF (%)</b>     |
|--------------|------------------------------|---------------------------------------------|---------------------------------------------|----------------------------------------|-----------------------------|------------------------------|--------------------|
| <i>Total</i> | NA                           | NA                                          | NA                                          | 368463 (98.7%)                         | 1504 (0.4%)                 | 12461 (3.4%)                 | 3656 (1.0%)        |
| <i>2007</i>  | 80828                        | 6 /5                                        | 1153 (1.4%)                                 | 1131 (98%)                             | 9 (0.8%)                    | 59 (5.2%)                    | Data not available |
| <i>2008</i>  | 80840                        | 36 / 7                                      | 11593 (14.3%)                               | 11165 (96.3%)                          | 73 (0.6%)                   | 325 (2.9%)                   | 212 (1.8%)         |
| <i>2009</i>  | 78149                        | 56 /16                                      | 32252 (41.3%)                               | 31659 (98.2%)                          | 10 (0.03%)                  | 1293 (4.1%)                  | 658 (2.0%)         |
| <i>2010</i>  | 80107                        | 61 /23                                      | 37437 (46.7%)                               | 36798 (98.3%)                          | 109 (0.3%)                  | 873 (2.4%)                   | 608 (1.6%)         |
| <i>2011</i>  | 77987                        | 60 /29                                      | 39087 (50.1%)                               | 38540 (98.6%)                          | 149 (0.4%)                  | 1126 (2.9%)                  | 444 (1.1%)         |
| <i>2012</i>  | 79566                        | 64 / 30                                     | 41307 (51.9%)                               | 40796 (98.8%)                          | 154 (0.3%)                  | 1363 (3.3%)                  | 311 (0.8%)         |
| <i>2013</i>  | 79732                        | 62 / 33                                     | 42912 (53.8%)                               | 42441 (98.9%)                          | 150 (0.3%)                  | 1332 (3.1%)                  | 422 (1.0%)         |
| <i>2014</i>  | 84736                        | 69 / 38                                     | 46060 (54.3%)                               | 45585 (98.9%)                          | 227 (0.4%)                  | 1510 (3.3%)                  | 364 (0.8%)         |
| <i>2015</i>  | 87499                        | 68 /37                                      | 50327 (57.5%)                               | 49741 (98.8%)                          | 308 (0.6%)                  | 1688 (3.4%)                  | 368 (0.7%)         |
| <i>2016</i>  | 94749                        | 69 /39                                      | 54379 (57.4%)                               | 53969 (99.2%)                          | 230 (0.4%)                  | 2110 (3.9%)                  | 261 (0.5%)         |

\* Newborns born at the participating birth centers and gynecological clinics

**Table S2.** Newborn hearing screening at University Children’s hospital for the years 2007-2016 with Benchmark indicators 1, 2, 3 an assessment within 4 months), NA: not applicable

|                                                 | 2007     | 2008     | 2009     | 2010     | 2011     | 2012     | 2013     | 2014     | 2015     | 2016     | Total      |
|-------------------------------------------------|----------|----------|----------|----------|----------|----------|----------|----------|----------|----------|------------|
| <b>Total population screened</b>                | 1436     | 1501     | 1487     | 1574     | 1765     | 2057     | 2081     | 2323     | 2194     | 2546     | 18964      |
| (Births in the university hospital + Transfers) | 1152+284 | 1244+257 | 1212+275 | 1337+237 | 1435+330 | 1494+563 | 1693+388 | 1845+478 | 1809+385 | 2106+440 | 15327+3637 |
| <b>Newborns referred to S2 or FU1 at DSFC</b>   | 59       | 256      | 289      | 253      | 226      | 209      | 251      | 268      | 298      | 259      | 2368       |
| No. of newborns receiving S2/FU1                | 6/53     | 141/115  | 33/265   | 26/227   | 40/186   | 23/186   | 11/240   | 7/261    | 4/294    | 9/250    | 300/2068   |
| <b>Benchmark indicator 1* (%)</b>               | 4.2      | 34.9     | 88.6     | 92.3     | 95.6     | 99.1     | 97.4     | 99.3     | 99.0     | 99.9     | NA         |
| Newborns sent for FU2 which is Referral rate.   | 9        | 74       | 80       | 76       | 80       | 92       | 133      | 151      | 124      | 120      | 939        |
| <b>Benchmark indicator 2 (%)</b>                | 0.6      | 4.9      | 5.4      | 4.4      | 4.5      | 4.5      | 6.4      | 6.5      | 5.7      | 4.7      | 5.0        |
| Newborns who received F2 within 3 months.       | 4        | 42       | 48       | 43       | 33       | 57       | 94       | 107      | 84       | 89       | 601        |
| <b>Benchmark indicator 3 (%)</b>                | 44.4     | 56.8     | 60.0     | 56.6     | 41.3     | 62.0     | 70.7     | 70.9     | 67.7     | 74.2     | 64.0       |
| Newborns who received F2 within 4 months.       | 4        | 44       | 56       | 55       | 47       | 66       | 104      | 117      | 104      | 103      | 700        |
| <b>(%)</b>                                      | 44.4     | 59.5     | 70.0     | 72.4     | 58.6     | 71.7     | 78.2     | 77.4     | 83.8     | 85.8     |            |

\*Benchmark 1: newborns completing ‘screening’ (S1 and S2) by 30 days
